# Supplementary material for: Human monoclonal antibodies isolated from a primary pneumococcal conjugate Vaccinee demonstrates the expansion of an antigen-driven Hypermutated memory B cell response
Source: Springer Nature journal article supplement (doi:10.1186/s12879-018-3517-7), 2018-12-01

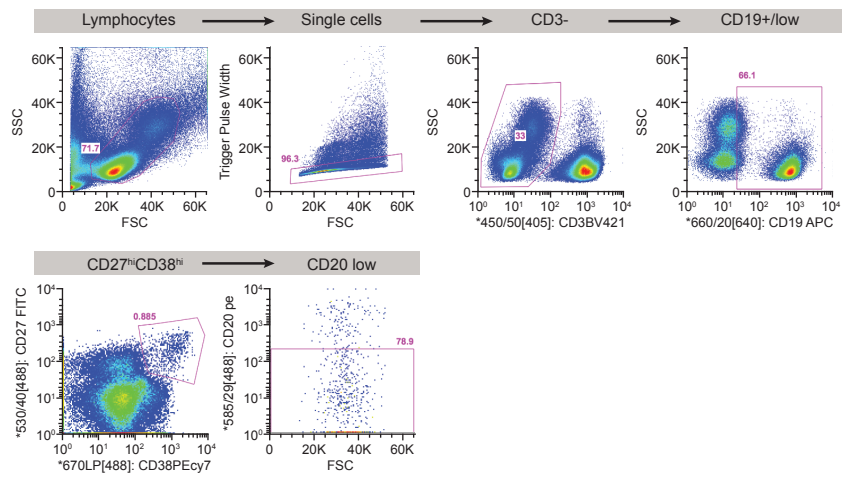

Supplement: MOESM1 [file 16314084]
